# Supplementary material for: Placenta-Expanded Stromal Cell Therapy in a Rodent Model of Simulated Weightlessness
Source: MDPI journal article supplement (doi:10.3390/cells10040940), 2021-04-19
Supplement: s1 [file s1]

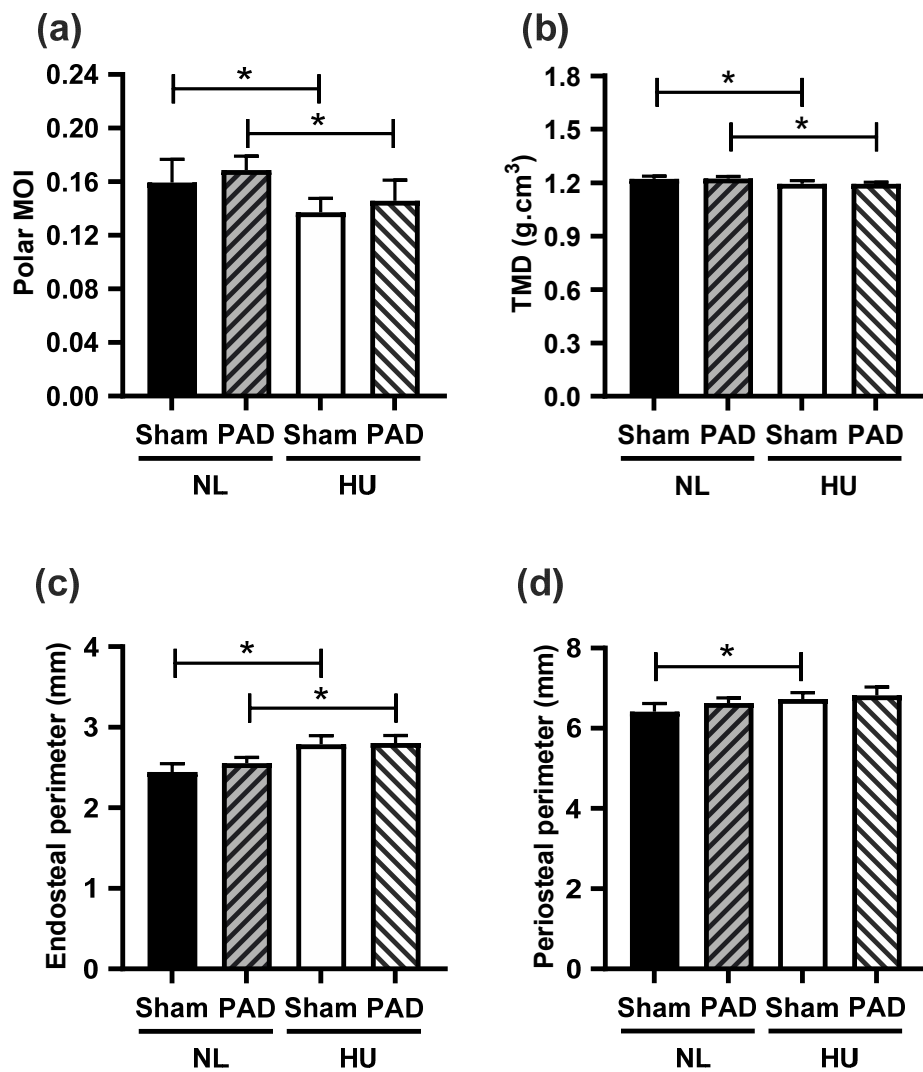

**Supplementary Figure 2.** Microcomputed tomography analysis of cortical bone of tibia at 30 days post-HU. (a) Polar Moment of Inertia, pMOI; (b) Tissue Mineral Density, TMD; (c) Endosteal Perimeter, Es.Pm.; and (d) Periosteal Perimeter, Ps.Pm. NL Sham (n=11), NL PAD (n=12), HU Sham (n=11), and HU PAD (n=10). (b-d). Statistically significant by one-way ANOVA and Tukey post-hoc test at  $p < 0.05$ . (a) statistically significant by nonparametric Wilcoxon all pairs test at  $p < 0.05$ .
