# Supplementary material for: Placenta-Expanded Stromal Cell Therapy in a Rodent Model of Simulated Weightlessness
Source: MDPI journal article supplement (doi:10.3390/cells10040940), 2021-04-19
Supplement: s1 [file s1]

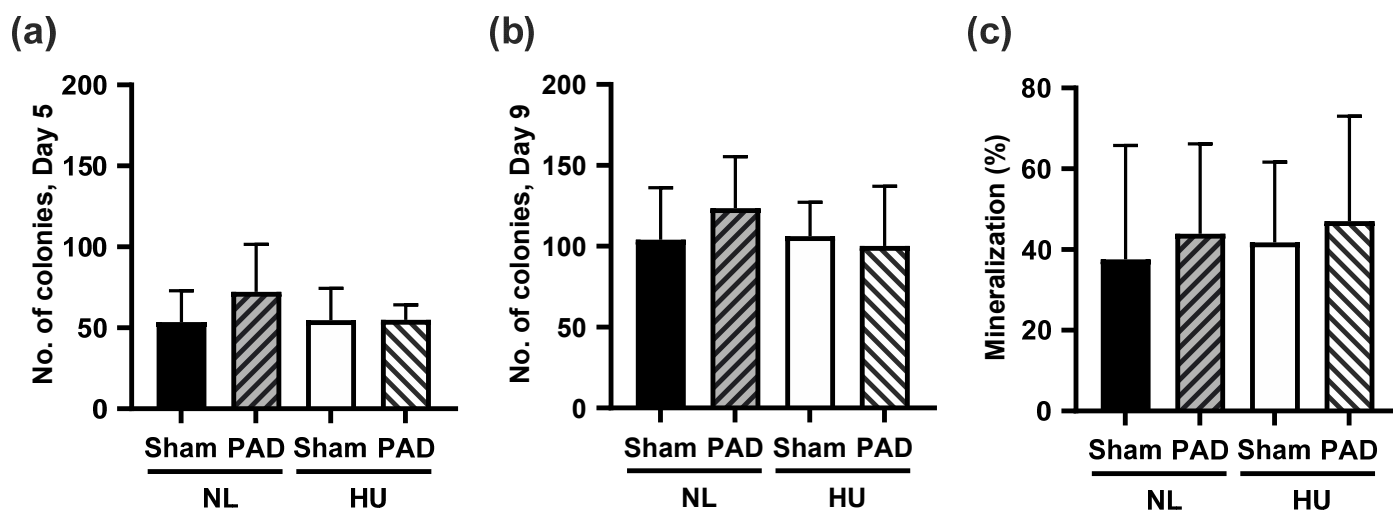

**Supplementary Figure 3. *Ex vivo* osteoblastogenesis assay from bone marrow stromal cells (BMSCs) of HU and NL mice.** Colonies growing on a 6 cm dish (11.55 cm<sup>2</sup>) were scored. (a) Colony numbers at Day 5 in culture. NL Sham (n=7), NL PAD (n=6), HU Sham (n=7), and HU PAD (n=6). Statistical analysis by non-parametric Wilcoxon all pairs test at p<0.05. (b) Colony numbers at Day 9 in culture. NL Sham (n=7), NL PAD (n=6), HU Sham (n=7), and HU PAD (n=6). Statistical analysis by one-way ANOVA at p<0.05. (c) Percent mineralization following 22 days of culture in osteogenic media. Statistical analysis by nonparametric Wilcoxon all pairs test at p<0.05.
