# Supplementary material for: Placenta-Expanded Stromal Cell Therapy in a Rodent Model of Simulated Weightlessness
Source: MDPI journal article supplement (doi:10.3390/cells10040940), 2021-04-19
Supplement: s1 [file s1]

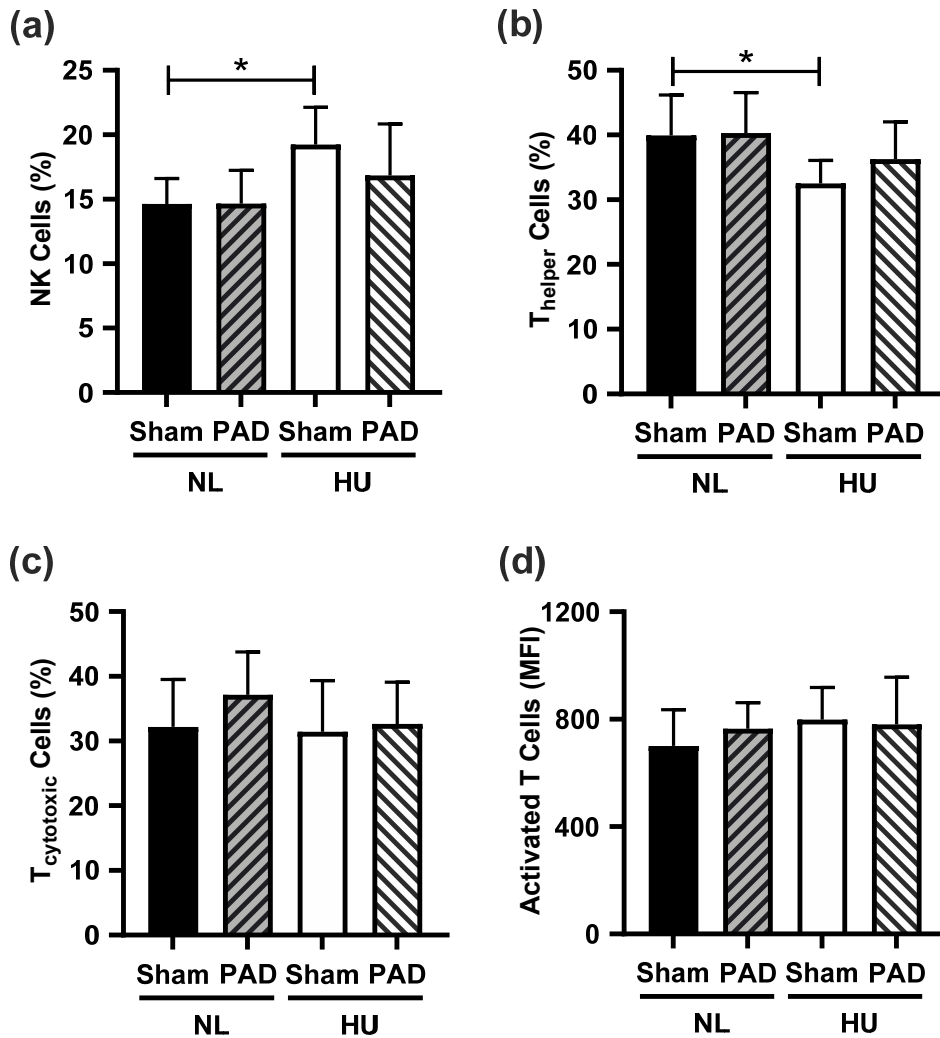

**Supplementary Figure 4. Results from flow cytometry of whole blood collected from mice at day 30 post-HU.** (a) Natural killer cells within leukocytes population percentages (%; NKp46+CD11b+/CD45+); (b) T helper lymphocytes within leukocyte population percentage (%; CD4+CD8-/CD3+/CD45+); (c) T cytotoxic lymphocytes within leukocyte population percentage (%; CD8+CD4-/CD3+/CD45+). NL Sham (n=12), NL PAD (n=12), HU Sham (n=11), and HU PAD (n=9); Statistical analysis by one-way ANOVA at  $p < 0.05$ . (d) Median fluorescence intensity of CD69 (activated T cells) within total lymphocytes population percentage (MFI, CD69+/CD3+/CD45+).
