# Supplementary material for: Placenta-Expanded Stromal Cell Therapy in a Rodent Model of Simulated Weightlessness
Source: MDPI journal article supplement (doi:10.3390/cells10040940), 2021-04-19
Supplement: s1 [file s1]

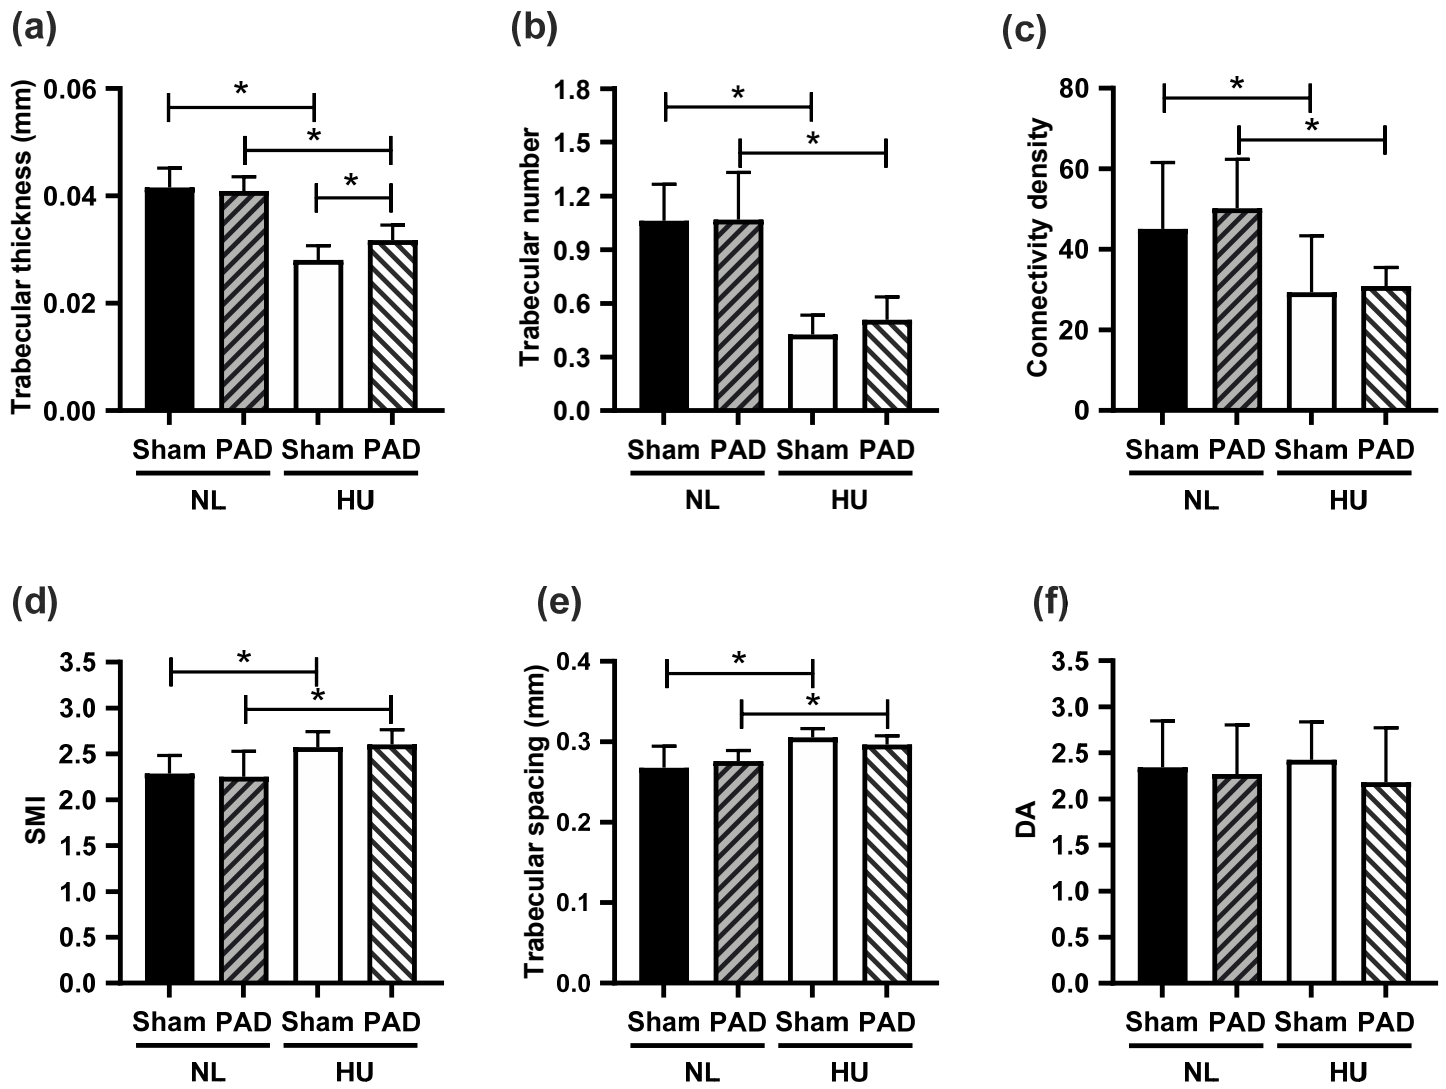

**Supplementary Figure 1. Microcomputed tomography analysis of cancellous bone of tibia at 30 days post-HU.** (a) Trabecular Thickness, Tb.Th.; (b) Trabecular Number, Tb.N.; (c) Connectivity Density, Conn.D.; (d) Structural Model Index, SMI; (e) Trabecular Spacing, Tb.Sp.; and (f) Degree of Anisotropy (DA). NL Sham (n=12), NL PAD (n=12), HU Sham (n=10), and HU PAD (n=10). (a, e, and f): \*Statistically significant by one-way ANOVA and Tukey post-hoc test at  $p < 0.05$ . (b-d): \*Statistically significant by nonparametric Wilcoxon all pairs test at  $p < 0.05$ .
