# Supplementary material for: Placenta-Expanded Stromal Cell Therapy in a Rodent Model of Simulated Weightlessness
Source: MDPI journal article supplement (doi:10.3390/cells10040940), 2021-04-19
Supplement: s1 [file s1]

**Supplementary Table 2.** Summary of statistical analysis of hippocampal and plasma cytokines.

A. Summary of statistical analysis of hippocampal cytokines

|                                                    |                                                 |
|----------------------------------------------------|-------------------------------------------------|
| Cytokines altered by HU (no mitigation by PLX-PAD) | EPO                                             |
| Cytokines altered by HU and mitigated by PLX-PAD   | IL-2, IL-6, IL-7, IL-13, MIG, MCSF, IL-5, MCP-1 |

B. Summary of statistical analysis of plasma cytokines

|                                                    |                      |
|----------------------------------------------------|----------------------|
| Cytokines altered by HU (no mitigation by PLX-PAD) | Timp1                |
| Cytokines altered by HU and mitigated by PLX-PAD   | IL-6 (high variance) |
