# Supplementary material for: Placenta-Expanded Stromal Cell Therapy in a Rodent Model of Simulated Weightlessness
Source: Cells. 2021 Apr 19;10(4):940. doi: 10.3390/cells10040940 (PMC8073415; doi:10.3390/cells10040940)
Supplement: Supplementary file 1 [file cells-10-00940-s001.zip]

Archive with 7 entries (7 files):
- Suppl Fig 1 revised.pdf
- Suppl Fig 2 revised.pdf
- Suppl Fig 3 revised.pdf
- Suppl Fig 4 revised.pdf
- Suppl Table 1 Cytokine average and SD Final.xlsx
- Suppl Table 2 Summary of cytokine results Final corrected.pdf
- Supplementary Methods Final v2.pdf
