# Supplementary material for: Placenta-Expanded Stromal Cell Therapy in a Rodent Model of Simulated Weightlessness
Source: Cells. 2021 Apr 19;10(4):940. doi: 10.3390/cells10040940 (PMC8073415; doi:10.3390/cells10040940)
Supplement: Supplementary file 1 [file cells-10-00940-s001.zip › Suppl Table 1 Cytokine average and SD Final.xlsx]

## Sheet: Sheet1
Hippocampus (pg/mg tissue)
Treatment Groups	Eotaxin	G-CSF	GM-CSF	IFNy	IL-1a	IL-1B	IL-2	IL-3	IL-4	IL-5	IL-6	IL-7	IL-9	IL-10	IL-12	IL-12	IL-13	IL-15	IL-17	IP-10	KC	LIF	MCP-1	M-CSF	MIG	MIP-1a	MIP-1B	MIP-2	RANTES	TNFa	VEGF	EPO	6Ckine/Exodus 2	Fractalkine	IFNB-1	IL-11	IL-16	MDC	MCP-5	MIP-3B	TARC
Sham NL, Mean	4.38914	0.984459	0.515957	8.27865	83.8676	4.28838	97.1395	0.14351	0.0261367	0.419684	1.12064	6.219	3126.04	6.67648	1.16131	3.60939	106.585	19.291	0.820332	12.7967	1.40438	0.675401	557	7.2054	33.4128	111.117	0.713054	196.178	7.56713	0.438351	8.3294	9.35649	116.647	972.396	62.4767	0.792964	349.768	42.6966	25.5532	16.3992	7.28531
Sham NL, Std Dev	0.600053	0.309114	0.971671	2.92344	24.4408	2.22736	25.3149	0.118923	0.0374073	0.218418	0.221031	0.919238	1014.9	1.50784	0.616418	1.4132	42.0381	3.34858	0.174829	4.31161	2.32401	0.126656	132.87	1.22251	11.701	46.9149	2.01682	58.0119	2.35215	0.578738	5.91785	5.25806	23.8998	102.153	11.4294	0.84401	44.0541	10.6164	7.14281	3.00213	1.00841
Sham HU, Mean	4.07943	0.911741	0.367983	6.05426	58.9508	2.032	65.2018	0.0686737	0.0110486	0.231235	0.699426	4.92284	2478.85	5.93323	0.387482	2.79151	58.5783	15.8733	0.518564	8.8263	0.272292	0.544195	362.83	5.38405	22.6168	81.2919	0	167.739	6.14603	0.338378	6.69899	2.27254	111.175	943.584	54.4683	0.154893	336.614	31.404	21.0291	15.5391	6.6736
Sham HU, Std Dev	1.10506	0.407297	0.718685	3.31907	28.157	1.61384	20.61	0.0859614	0.0206172	0.202894	0.29906	1.17338	913.981	0.852093	0.617742	0.820194	35.0336	2.97352	0.332604	2.48484	0.510295	0.0896073	164.009	1.58857	9.62169	22.8447	0	42.5851	1.64366	0.663732	5.12076	3.23245	14.2516	128.337	5.85951	0.416378	50.4152	11.5124	3.43568	2.27405	1.22833
PLX-PAD NL, Mean	4.60698	1.04747	0.55075	7.68489	78.9825	4.334	85.3579	0.137432	0.0110186	0.555858	1.26076	6.00493	3237.82	6.90606	0.676041	3.76479	98.2059	18.1864	0.81928	12.2132	0.514714	0.709264	524.46	6.78996	33.3851	112.689	2.20652	200.051	7.77792	0.52673	9.05379	4.67485	122.313	1043.6	65.5025	1.65017	369.397	41.2424	25.8944	18.3577	6.57114
PLX-PAD NL, Std Dev	1.06121	0.439552	1.17654	3.01748	30.6893	2.88313	31.7671	0.165603	0.0311653	0.339098	0.575701	1.5453	996.924	1.4586	1.03888	2.16408	44.7809	4.53475	0.479007	4.00571	0.730398	0.227498	200.343	2.07288	11.1995	30.3201	4.42007	55.7466	1.9539	0.715584	4.76891	7.28577	20.7568	145.366	10.6515	1.27888	33.6594	13.2958	4.06419	2.06188	0.978525
PLX-PAD HU, Mean	4.34748	0.984811	0.852026	7.51997	77.1025	3.57423	82.2539	0.125474	0.0167135	0.404574	1.03178	6.17581	3065.98	6.23706	0.377703	4.97218	78.0758	17.8417	0.712091	11.1849	1.13852	0.574511	481.712	7.4701	29.8147	95.5695	0.823859	179.18	7.731	0.335968	8.39193	2.18251	127.878	1032.6	61.387	0.539723	345.652	40.0784	24.0357	14.5121	7.96874
PLX-PAD HU, Std Dev	0.949535	0.537168	1.26881	1.88322	19.2743	1.88718	11.6832	0.153955	0.0261583	0.200678	0.214413	0.863011	822.053	1.16288	0.289181	1.43567	21.949	3.19438	0.229384	4.78061	2.66134	0.172957	88.6376	1.35877	6.60789	29.8402	1.61416	34.3445	1.71052	0.950262	6.04901	3.06085	23.5148	98.927	10.5493	0.76294	62.9702	6.68615	5.25991	4.03576	1.30383
Plasma (pg/mL)
Treatment Groups	Eotaxin	G-CSF	GM-CSF	IFNy	IL-1a	IL-1B	IL-2	IL-3	IL-4	IL-5	IL-6	IL-7	IL-9	IL-10	IL-12	IL-12	IL-13	IL-15	IL-17	IP-10	KC	LIF	LIX	MCP-1	M-CSF	MIG	MIP-1a	MIP-1B	MIP-2	RANTES	TNFa	VEGF	EPO	6Ckine/Exodus 2	Fractalkine	IFNB-1	IL-11	IL-16	IL-20	MDC	MCP-5	MIP-3a	MIP-3B	TARC	TIMP-1
Sham NL, Mean	1354.49	94.9425	8.34625	1.24775	44.8563	11.8375	23.265	1.43125	0.83125	5.445	1.7075	9.32125	15.5613	15.7787	17.0112	73.8325	55.115	231.98	3.275	58.3337	257.39	1.27	1119.01	47.1238	11.4725	27.4813	78.9963	33.1188	96.8237	44.9913	2.24	1.26375	273.53	2014.37	150.259	64.7925	10.72	538.2	178.546	329.63	61.8875	21.5925	143.666	30.215	606.036
Sham NL, Std Dev	648.82	40.1565	8.27325	2.28552	42.7437	14.5479	23.0582	1.06203	0.741455	2.9384	2.12949	8.54889	9.00716	12.7856	22.2609	66.9502	17.2024	174.508	3.03675	23.2947	131.367	1.18079	375.752	27.4377	10.1971	19.2976	60.1744	33.7569	57.7806	21.3938	2.78469	0.859201	153.735	567.568	35.5057	32.4244	6.86149	196.664	91.9925	217.616	37.2377	13.0636	141.557	16.3371	194.553
Sham HU, Mean	1324.91	87.8025	8.4325	1.68375	42.7425	11.1225	18.2963	0.8325	0.5675	3.73125	0.8725	7.2775	16.9962	12.7988	12.0475	50.97	56.045	170.379	2.28875	36.2325	202.012	1.21625	1080.9	29.665	11.4712	17.1525	75.1438	36.6575	92.0775	38.4225	1.36375	1.02625	230.185	1625.86	129.926	57.6787	12.1688	339.71	259.977	221.783	42.1112	16.7238	98.8175	30.8013	331.953
Sham HU, Std Dev	755.343	34.2196	7.25925	2.72202	33.1317	16.4794	15.6135	1.10032	0.619487	1.55452	1.66099	7.02947	11.3245	11.9452	18.2426	60.8025	11.8998	123.564	2.11515	7.80889	56.201	1.31072	531.075	27.2961	13.3831	8.27298	58.1497	28.11	61.572	13.3958	2.84579	0.824551	109.552	430.883	26.0587	20.5634	6.62479	84.3915	120.24	61.0725	16.6301	5.99696	34.1697	15.0055	76.6313
PLX-PAD NL, Mean	1080.16	92.4025	12.1087	2.57875	92.3725	17.6475	28.33	1.26	0.9675	10.9625	2.1375	13.7312	18.3025	20.9112	22.6	76.8875	56.7325	361.991	3.14875	66.6388	231.361	2.03	1557.31	50.1825	16.9037	28.41	100.63	43.6925	100.333	42.305	2.23625	1.32	206.806	1766.33	153.527	74.095	20.58	580.096	230.725	293.744	64.7138	15.44	100.323	37.8687	611
PLX-PAD NL, Std Dev	587.86	39.5303	6.89747	1.67203	80.0831	17.5021	18.985	0.515419	0.661443	3.9161	1.35583	8.77795	10.6649	11.6752	19.2219	57.3143	14.4006	178.24	1.92061	42.7137	116.232	1.01057	619.883	20.7868	13.1509	17.5101	47.778	15.5259	69.9224	8.5593	2.04471	0.499657	111.294	429.212	35.7523	31.0918	7.97934	255.918	87.0901	104.352	27.9123	2.81121	20.7069	17.3388	160.297
PLX-PAD HU, Mean	1386.39	162.28	10.9663	1.83375	85.5112	13.6125	27.22	1.3175	0.7525	13.9912	4.9775	7.30875	18.555	19.99	16.2413	64.5187	57.3325	247.751	3.2575	42.7375	291.501	1.39	1332.65	31.9812	12.75	26.1625	81.2812	30.4375	108.508	57.77	2.07375	1.1675	216.179	1822.93	144.259	62.8763	12.0525	611.164	353.555	338.666	48.7913	14.5587	103.536	44.71	524.47
PLX-PAD HU, Std Dev	614.863	143.799	8.35042	1.89385	90.4596	16.3836	11.3067	1.27245	0.631297	17.1382	8.65915	6.48486	9.16709	10.2669	20.1325	59.5434	8.16304	122.121	2.86842	14.8198	94.925	1.1758	580.226	16.2366	13.3384	19.9141	58.8122	34.3056	49.2379	24.5762	2.58547	0.554714	130.147	668.504	30.2802	22.6211	7.69513	382.214	141.344	171.126	19.7819	3.20819	35.1205	23.2124	330.927
